# Supplementary material for: The IFIH1/MDA5 rs1990760 Gene Variant (946Thr) Differentiates Early- vs. Late-Onset Skin Disease and Increases the Risk of Arthritis in a Spanish Cohort of Psoriasis
Source: MDPI journal article supplement (doi:10.3390/ijms241914803), 2023-09-30
Supplement: s1 [file s1]

**Suppl. Table S1.** Distribution of the *IFIH1* genotypes according to the Cw6\*0602 status.

|                |                   | Psor ≤40    | Psor >40  |         | Cts ≤40<br>n=100 | Cts >40<br>N=100 | Cts total<br>N=200 |
|----------------|-------------------|-------------|-----------|---------|------------------|------------------|--------------------|
|                | <b>rs1990760</b>  | N=211       | N=30      |         | N= 7             | N =6             | N=13               |
| <b>Cw6 +ve</b> | TT                | 94 (45%)    | 8 (27%)   | p=0.06  | 5                | 3                | 8 (62%)            |
|                | TC                | 91 (43%)    | 15 (50%)  |         | 1                | 2                | 3 (23%)            |
|                | CC                | 26 (12%)    | 7 (23%)   |         | 1                | 1                | 2 (15%)            |
|                |                   |             |           |         |                  |                  |                    |
|                |                   | N=229       | N=102     |         | N=93             | N=94             | N=187              |
| <b>Cw6 -ve</b> | TT                | 85 (37%)    | 32 (32%)  | p<0.001 | 37               | 40               | 77 (41%)           |
|                | TC                | 129 (56%)   | 41 (40%)  |         | 42               | 42               | 84 (45%)           |
|                | CC                | 15 (7%)     | 29 (28%)  |         | 14               | 12               | 26 (14%)           |
|                |                   |             |           |         |                  |                  |                    |
|                |                   |             |           |         |                  |                  |                    |
|                | <b>rs35337543</b> |             |           |         |                  |                  |                    |
| <b>Cw6 +ve</b> | GG                | 210 (99.5%) | 28 (94%)  | p=0.05  | 7                | 6                | 13 (100%)          |
|                | GC                | 1 (0.5%)    | 2 (6%)    |         | 0                | 0                | 0                  |
|                |                   |             |           |         |                  |                  |                    |
| <b>Cw6 -ve</b> | GG                | 220 (96%)   | 100 (98%) | p=0.29  | 91               | 92               | 183 (98%)          |
|                | GC                | 9 (4%)      | 2 (2%)    |         | 2                | 2                | 4                  |
|                |                   |             |           |         |                  |                  |                    |
|                | <b>rs35744605</b> |             |           |         |                  |                  |                    |
| <b>Cw6 +ve</b> | CC                | 210 (99.5%) | 29 (97%)  | p=0.23  | 7                | 6                | 13 (100%)          |
|                | CA                | 1 (0.5%)    | 1 (3%)    |         | 0                | 0                |                    |
|                |                   |             |           |         |                  |                  |                    |
| <b>Cw6 -ve</b> | CC                | 222 (97%)   | 100 (98%) | p=0.44  | 92               | 92               | 184 (98%)          |
|                | CA                | 7 (3%)      | 2 (2%)    |         | 1                | 2                | 3 (2%)             |

|               |     |  |                |                |                 |                  |                  |
|---------------|-----|--|----------------|----------------|-----------------|------------------|------------------|
| Rs1990760 C>T | EUR |  | C: 0.395 (397) | T: 0.605 (609) | C C: 0.141 (71) | C T: 0.507 (255) | T T: 0.352 (177) |
|               | CEU |  | C: 0.384 (76)  | T: 0.616 (122) | C C: 0.111 (11) | C T: 0.545 (54)  | T T: 0.343 (34)  |
|               | FIN |  | C: 0.409 (81)  | T: 0.591 (117) | C C: 0.162 (16) | C T: 0.495 (49)  | T T: 0.343 (34)  |
|               | GBR |  | C: 0.385 (70)  | T: 0.615 (112) | C C: 0.154 (14) | C T: 0.462 (42)  | T T: 0.385 (35)  |
|               | IBS |  | C: 0.355 (76)  | T: 0.645 (138) | C C: 0.131 (14) | C T: 0.449 (48)  | T T: 0.421 (45)  |
|               | TSI |  | C: 0.439 (94)  | T: 0.561 (120) | C C: 0.150 (16) | C T: 0.579 (62)  | T T: 0.271 (29)  |

  

|                |     |  |                |               |                  |                 |
|----------------|-----|--|----------------|---------------|------------------|-----------------|
| rs35337543 C>G | EUR |  | C: 0.981 (987) | G: 0.019 (19) | C C: 0.962 (484) | C G: 0.038 (19) |
|                | CEU |  | C: 0.990 (196) | G: 0.010 (2)  | C C: 0.980 (97)  | C G: 0.020 (2)  |
|                | FIN |  | C: 1.000 (198) |               | C C: 1.000 (99)  |                 |
|                | GBR |  | C: 0.984 (179) | G: 0.016 (3)  | C C: 0.967 (88)  | C G: 0.033 (3)  |
|                | IBS |  | C: 0.953 (204) | G: 0.047 (10) | C C: 0.907 (97)  | C G: 0.093 (10) |
|                | TSI |  | C: 0.981 (210) | G: 0.019 (4)  | C C: 0.963 (103) | C G: 0.037 (4)  |

  

|                |     |  |                 |              |                  |                |
|----------------|-----|--|-----------------|--------------|------------------|----------------|
| Rs35744605 C>A | EUR |  | C: 0.996 (1002) | A: 0.004 (4) | C C: 0.992 (499) | A C: 0.008 (4) |
|                | CEU |  | C: 1.000 (198)  |              | C C: 1.000 (99)  |                |
|                | FIN |  | C: 0.995 (197)  | A: 0.005 (1) | C C: 0.990 (98)  | A C: 0.010 (1) |
|                | GBR |  | C: 0.989 (180)  | A: 0.011 (2) | C C: 0.978 (89)  | A C: 0.022 (2) |
|                | IBS |  | C: 0.995 (213)  | A: 0.005 (1) | C C: 0.991 (106) | A C: 0.009 (1) |
|                | TSI |  | C: 1.000 (214)  |              | C C: 1.000 (107) |                |

**Suppl. Figure S1.** Allele and genotype frequencies for the three IFIH1 SNPs in different European populations.

Eur: Europeans admixed.

CEU: Utah Residents of European ancestry.

FIN: Finnish in Finland.

GBR: British in England and Scotland.

IBS: Iberian population in Spain.

TSI: Toscani in Italy.
